# Supplementary material for: Neuroplasticity within and between Functional Brain Networks in Mental Training Based on Long-Term Meditation
Source: MDPI journal article supplement (doi:10.3390/brainsci11081086), 2021-08-18
Supplement: s1 [file s1]

## Supplementary Information

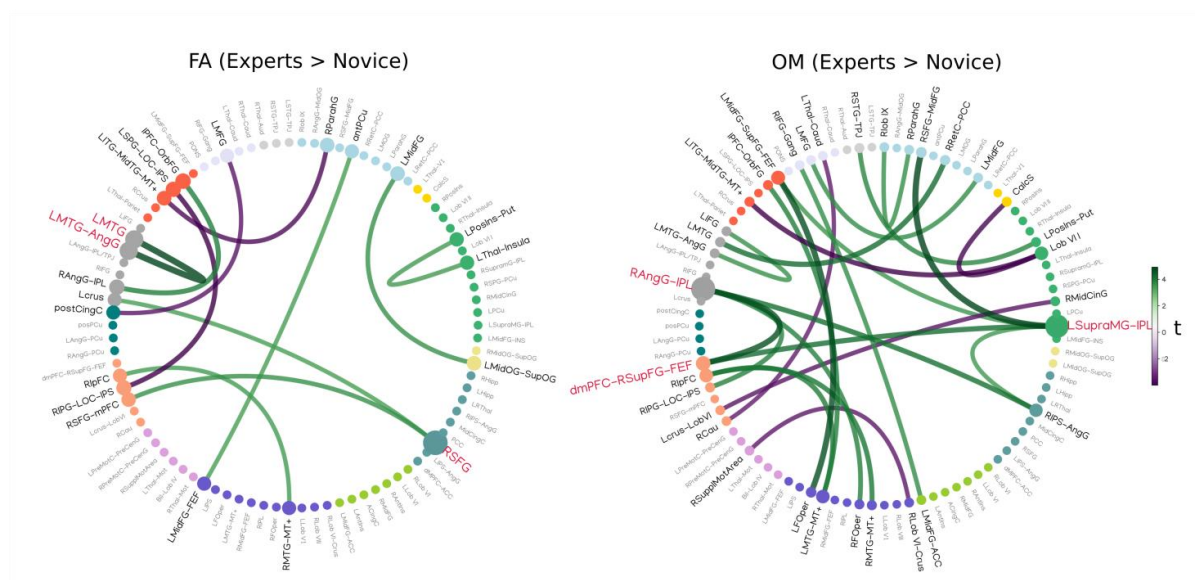

**Figure S1:** *Differential connectivities between meditators and control group.* Figure shows the connectivities that are statistically different in experts > controls (two-sided t-test;  $p < 0.01$  FDR corrected), in FA (left panel) and OM (right panel).

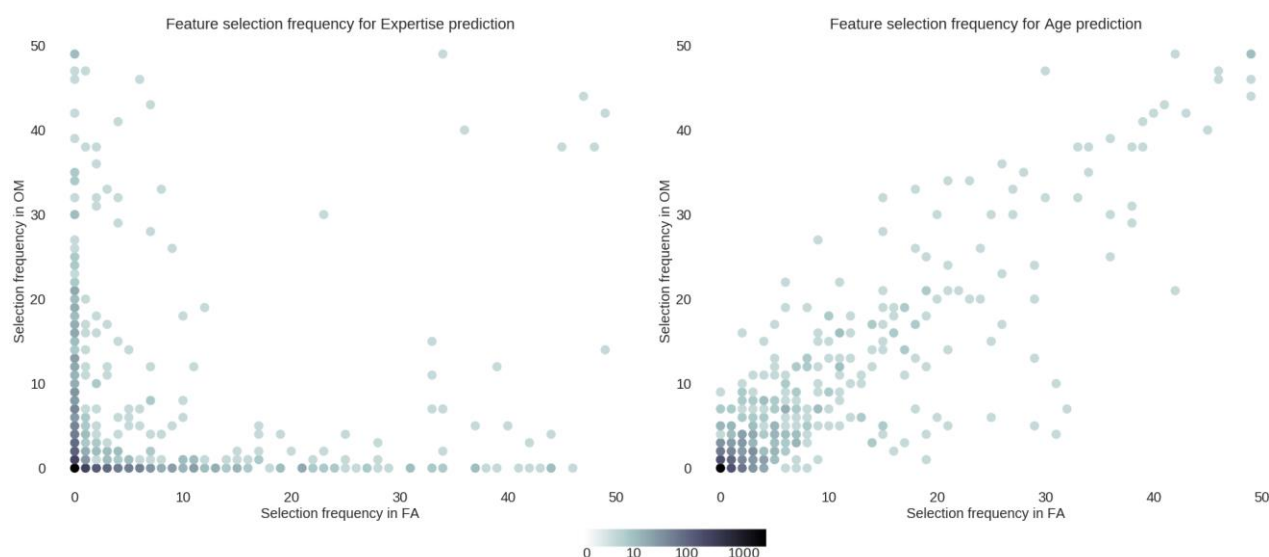

**Figure S2:** Feature selection frequency for expertise and age prediction in control analysis. Figure shows feature selection frequency for meditation expertise prediction (panel a) and age prediction (panel b), for focused attention (x-axis) and open monitoring meditation styles (y-axis). The maximum frequency value is equal to the number of cross-validation folds. The color of the dots indicates the number of features with that particular selection frequency.

**Table S1:** List of selected ROIs. Coordinates (x,y,z) of ROIs used for functional connectivity analysis, according to MNI atlas.

| Coordinates |     |     | Regions                                             | Labels           | Network       | Voxels |
|-------------|-----|-----|-----------------------------------------------------|------------------|---------------|--------|
| -56         | -14 | 7   | Left Superior Temporal/ Heschl's Gyrus              | LSTG-TPJ         | Auditory      | 962    |
| 56          | -7  | 6   | Right Superior Temporal Gyrus                       | RSTG-TPJ         | Auditory      | 554    |
| 13          | -16 | -2  | Right Thalamus                                      | RThal-Aud        | Auditory      | 26     |
| 14          | -2  | 8   | Right Thalamus. Caudate                             | RThal-Caud       | Basal Ganglia | 669    |
| -14         | -3  | 7   | Left Thalamus. Caudate.                             | LThal-Caud       | Basal Ganglia | 828    |
| -44         | 22  | 23  | Left Inferior Frontal Gyrus                         | LMFG             | Basal Ganglia | 18     |
| 48          | 28  | 17  | Right Inferior Frontal Gyrus                        | RIFG-Gang        | Basal Ganglia | 63     |
| -6          | -26 | -38 | Pons                                                | PONS             | Basal Ganglia | 32     |
| -30         | 23  | 49  | Left Middle Frontal eye Fields.                     | LMidFG-SupFG-FEF | LECN          | 1501   |
| -40         | 48  | -1  | Left Inferior / Orbito Frontal Gyrus                | IPFC-OrbFG       | LECN          | 437    |
| -42         | -63 | 46  | Left Superior / Inferior Parietal Sulcus.           | LSPG-LOC-IPS     | LECN          | 2110   |
| -59         | -42 | -12 | Left Inferior / Middle Temporal Gyrus               | LITG-MidTG-MT+   | LECN          | 350    |
| 36          | -69 | -43 | Right Crus I                                        | RCrus            | LECN          | 310    |
| -14         | -28 | 2   | Left Thalamus                                       | LThal-Pariet     | LECN          | 8      |
| -49         | 25  | -4  | Inferior Frontal Gyrus                              | LIFG             | Language      | 652    |
| -52         | -1  | -22 | Left Middle Temporal Gyrus                          | LMTG             | Language      | 27     |
| -52         | -31 | -6  | Left Middle Temporal Gyrus. Angular Gyrus           | LMTG-AngG        | Language      | 317    |
| -54         | -55 | 22  | Left Angular Gyrus. Inferior Parietal Lobule.       | LAngG-IPL/TPJ    | Language      | 1420   |
| 49          | 28  | -10 | Right Inferior Frontal Gyrus                        | RIFG             | Language      | 58     |
| 55          | -43 | 10  | Right Angular Gyrus. Inferior Parietal Lobule.      | RAngG-IPL        | Language      | 1106   |
| -22         | -80 | -35 | Left Crus I                                         | LCrus            | Language      | 270    |
| 2           | -28 | 27  | Midcingulate / Posterior Cingulate Cortex           | postCingC        | Precuneus     | 579    |
| 3           | -72 | 40  | Posterior Precuneus                                 | posPCu           | Precuneus     | 1572   |
| -36         | -62 | 46  | Left Angular Gyrus                                  | LAngG-PCu        | Precuneus     | 388    |
| 39          | -62 | 45  | Right Angular Gyrus                                 | RAngG-PCu        | Precuneus     | 96     |
| 38          | 26  | 42  | Dorsomedial Prefrontal Cortex.                      | dmPFC-RSupFG-FEF | RECN          | 2093   |
| 38          | 54  | 1   | Right Left Posterior Frontal Cortex                 | RlpFC            | RECN          | 356    |
| 48          | -54 | 47  | Right Inferior Parietal Gyrus. Intraparietal Sulcus | RIPG-LOC-IPS     | RECN          | 1873   |
| 5           | 37  | 46  | Right Superior Frontal Gyrus                        | RSFG-mPFC        | RECN          | 83     |
| -30         | -73 | -39 | Left Crus I. Crus II. Lobule VI                     | Lcrus-LobVI      | RECN          | 2403   |
| 13          | 2   | 14  | Right Caudate                                       | Rcau             | RECN          | 188    |
| -33         | -21 | 60  | Left Precentral / Postcentral Gyrus                 | LPreMotC-PreCenG | Sensorimotor  | 1365   |
| 38          | -18 | 57  | Right Precentral / Postcentral Gyrus                | RPreMotC-PreCenG | Sensorimotor  | 1446   |
| 3           | -13 | 61  | Right Supplementary Motor Area                      | RSupplMotArea    | Sensorimotor  | 159    |
| -12         | -19 | -1  | Left Thalamus                                       | LThal-Mot        | Sensorimotor  | 19     |
| -2          | -52 | -19 | Bilateral Lobule IV                                 | Bil-Lob IV       | Sensorimotor  | 2015   |
| 12          | -20 | -4  | Right Thalamus                                      | RThal-Mot        | Sensorimotor  | 20     |
| -27         | -1  | 54  | Left Middle Frontal Gyrus. Frontal Eye Fields       | LMidFG-FEF       | Visuospatial  | 338    |
| -36         | -46 | 47  | Left Intraparietal Sulcus                           | LIPS             | Visuospatial  | 2020   |
| -47         | 13  | 27  | Left Frontal Operculum. Inferior Frontal Gyrus      | LFOper           | Visuospatial  | 1105   |
| -49         | -65 | -6  | Left Middle Temporal Gyrus                          | LMTG-MT+         | Visuospatial  | 93     |
| 28          | 2   | 54  | Right Middle Frontal Gyrus                          | RMidFG-FEF       | Visuospatial  | 97     |
| 37          | -47 | 48  | Right Inferior Parietal Lobule                      | RIPL             | Visuospatial  | 1193   |
| 49          | 12  | 28  | Right Frontal Operculum.                            | RFOper           | Visuospatial  | 326    |
| 50          | -59 | -11 | Right Middle Temporal Gyrus                         | RMTG-MT+         | Visuospatial  | 76     |
| -27         | -72 | -52 | Left Lobule V111.                                   | LLob V1-FEF      | Visuospatial  | 38     |
| 24          | -73 | -51 | Right Lobule VIII.                                  | RLob VIII        | Visuospatial  | 131    |
| 34          | -70 | -26 | Right Lobule VI. Crus I                             | RLob VI-Crus     | Visuospatial  | 62     |

|     |     |     |                                                    |                |                    |      |
|-----|-----|-----|----------------------------------------------------|----------------|--------------------|------|
| -31 | 47  | 22  | Left Middle Frontal Gyrus                          | LMidFG-ACC     | anterior Salience  | 651  |
| -42 | 14  | -3  | Left Anterior Insula                               | LAntIns        | anterior Salience  | 305  |
| 0   | 17  | 47  | Anterior Cingulate Cortex.                         | ACingC         | anterior Salience  | 2887 |
| 28  | 46  | 26  | Right Middle Frontal Gyrus                         | RMidFG         | anterior Salience  | 470  |
| 43  | 15  | -1  | Right Anterior Insula                              | RAntIns        | anterior Salience  | 319  |
| -34 | -56 | -32 | Left Lobule VI. Crus I                             | LLob VI-Insula | anterior Salience  | 95   |
| 36  | -58 | -32 | Right Lobule VI. Crus I                            | RLob VI        | anterior Salience  | 139  |
| -3  | 49  | 14  | Medial Prefrontal / Anterior Cingulate Cortex.     | dMPFC-ACC      | dorsal DMN         | 5257 |
| -48 | -68 | 35  | Left Intraparietal Sulcus. Angular Gyrus           | LIPS-AngG      | dorsal DMN         | 97   |
| 19  | 38  | 47  | Right Superior Frontal Gyrus                       | RSFG           | dorsal DMN         | 137  |
| 1   | -53 | 28  | Posterior Cingulate Cortex. Precuneus              | PCC            | dorsal DMN         | 1555 |
| 2   | -15 | 36  | Midcingulate Cortex                                | MidCingC       | dorsal DMN         | 114  |
| 50  | -64 | 32  | Right Intraparietal Sulcus. Angular Gyrus          | RIPS-AngG      | dorsal DMN         | 38   |
| -1  | -8  | 4   | Left and Right Thalamus                            | LRThal         | dorsal DMN         | 220  |
| -24 | -29 | -13 | Left Hippocampus                                   | LHipp          | dorsal DMN         | 393  |
| 27  | -23 | -17 | Right Hippocampus                                  | RHipp          | dorsal DMN         | 142  |
| -29 | -87 | -1  | Left Middle / Superior Occipital Gyrus             | LMidOG-SupOG   | high Visual        | 868  |
| 32  | -85 | 0   | Right Middle /Superior Occipital Gyrus             | RMidOG-SupOG   | high Visual        | 1679 |
| -39 | 35  | 30  | Left Middle Frontal Gyrus                          | LMidFG-INS     | posterior Salience | 93   |
| -57 | -38 | 37  | Left Supramarginal/ Inferior Parietal Gyrus        | LSupramG-IPL   | posterior Salience | 1205 |
| -8  | -52 | 61  | Left Precuneus                                     | LPCu           | posterior Salience | 98   |
| 12  | -28 | 45  | Right Midcingulate Cortex                          | RMidCinG       | posterior Salience | 56   |
| 21  | -48 | 69  | Right Superior Parietal Gyrus. Precuneus           | RSPG-PCu       | posterior Salience | 133  |
| 59  | -32 | 36  | Right Supramarginal/ Inferior Parietal Gyrus       | RSupramG-IPL   | posterior Salience | 1002 |
| -12 | -21 | 5   | Left Thalamus                                      | LThal-Insula   | posterior Salience | 142  |
| -33 | -41 | -37 | Lobule VI I                                        | Lob VI I       | posterior Salience | 102  |
| -37 | -13 | -5  | Left Posterior Insula. Putamen                     | LPosIns-Put    | posterior Salience | 114  |
| 13  | -14 | 9   | Right Thalamus                                     | RThal-Insula   | posterior Salience | 63   |
| 36  | -43 | -40 | Lobule VI II                                       | Lob VI II      | posterior Salience | 13   |
| 40  | -6  | -9  | Right Posterior Insula                             | RPosIns        | posterior Salience | 134  |
| 0   | -74 | 11  | Calcarine Sulcus                                   | CalcS          | primary Visual     | 1116 |
| -18 | -24 | -4  | Left Thalamus                                      | LThal-V1       | primary Visual     | 4    |
| -12 | -58 | 15  | Left Retrosplenial and Posterior Cingulate Cortex  | LRetC-PCC      | ventral DMN        | 462  |
| -24 | 12  | 55  | Left Middle Frontal Gyrus                          | LMidFG         | ventral DMN        | 405  |
| -28 | -37 | -15 | Left Parahippocampal Gyrus                         | LParahG        | ventral DMN        | 134  |
| -36 | -81 | 32  | Left Middle Occipital Gyrus                        | LMOG           | ventral DMN        | 491  |
| 13  | -53 | 14  | Right Retrosplenial and Posterior Cingulate Cortex | RRetC-PCC      | ventral DMN        | 590  |
| 1   | -57 | 54  | Anterior Precuneus                                 | antPCu         | ventral DMN        | 1921 |
| 26  | 26  | 45  | Right Superior / Middle Frontal Gyrus              | RSFG-MidFG     | ventral DMN        | 399  |
| 28  | -33 | -19 | Right Parahippocampal Gyrus                        | RParahG        | ventral DMN        | 90   |
| 43  | -74 | 32  | Right Angular /Middle Occipital Gyrus              | RAngG-MidOG    | ventral DMN        | 752  |
| 15  | -46 | -53 | Right Lobule IX                                    | Rlob IX        | ventral DMN        | 81   |
